# Supplementary material for: Multi-stage explosion of lignin: a new horizon for constructing defect-rich carbon towards advanced lithium ion storage
Source: Royal Society of Chemistry journal article supplement (doi:10.1039/d2gc01635d), 2022-01-01
Supplement: d2gc01635d1.pdf [file d2gc01635d1.pdf]

## Supplemental Materials

### Multi-stage explosion of lignin: A new horizon for constructing defect-rich carbon towards advanced lithium ion storage

Caiwei Wang<sup>a</sup>, Dongjie Yang<sup>a,\*</sup>, Si Huang<sup>a</sup>, Yanlin Qin<sup>b,c</sup>, Wenli Zhang<sup>b,c</sup> and Xueqing Qiu<sup>b,c,\*</sup>

<sup>a</sup> *School of Chemistry and Chemical Engineering, Guangdong Provincial Engineering Research Center for Green Fine Chemicals, South China University of Technology, Guangzhou 510640, China*

<sup>b</sup> *School of Chemical Engineering and Light Industry, Guangdong University of Technology, Guangzhou, 510006, China*

<sup>c</sup> *Guangdong Provincial Key Laboratory of Plant Resources Biorefinery, 100 Waihuan Xi Road, Panyu District, Guangzhou 510006, China*

**\*Corresponding Authors:** Prof. Dongjie Yang, Xueqing Qiu

**E-mail address:** [cedjyang@scut.edu.cn](mailto:cedjyang@scut.edu.cn) (D. Yang), [cexqqiu@scut.edu.cn](mailto:cexqqiu@scut.edu.cn) (X. Qiu).

#### Table of Contents

|                            |   |
|----------------------------|---|
| Supplementary Figures..... | 1 |
| Supplementary Tables.....  | 7 |
| References.....            | 8 |

## Supplementary Figures

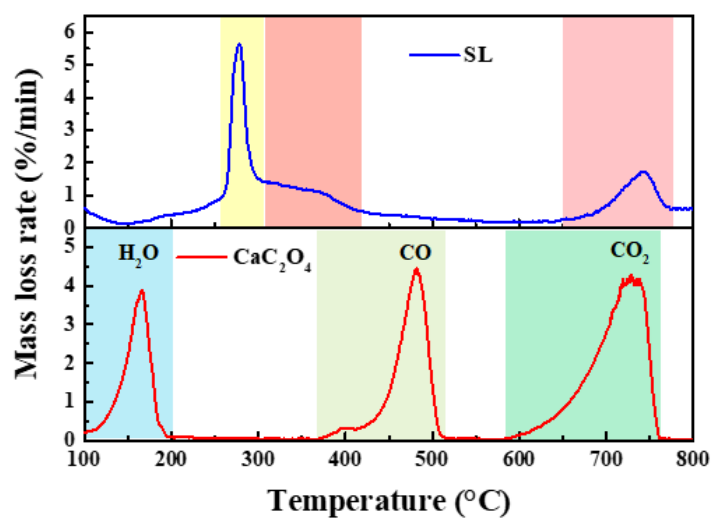

**Fig. S1.** DTG curves of SL and  $\text{CaC}_2\text{O}_4$ .

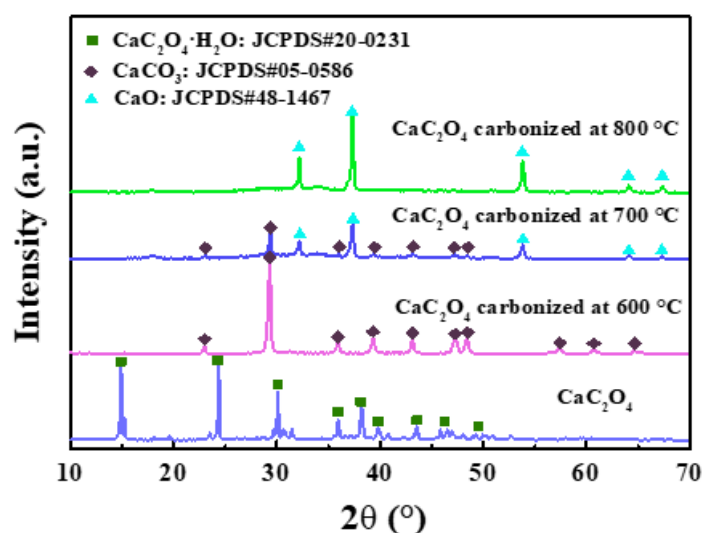

**Fig. S2.** XRD patterns of  $\text{CaC}_2\text{O}_4$  carbonized at 600-800 °C. The diffraction peak of pure  $\text{CaC}_2\text{O}_4$  fits well with that of  $\text{CaC}_2\text{O}_4 \cdot \text{H}_2\text{O}$  (JCPDS #20-0231). The diffraction peak of  $\text{CaC}_2\text{O}_4$  carbonized at 600 °C accords well with those of  $\text{CaCO}_3$  (JCPDS #05-0586), indicating that  $\text{CaC}_2\text{O}_4$  was completely decomposed into  $\text{CaCO}_3$  at 600 °C.  $\text{CaC}_2\text{O}_4$  carbonized at 700 °C presents the diffraction peak in good agreement with  $\text{CaCO}_3$  (JCPDS #05-0586) and  $\text{CaO}$  (JCPDS #48-1467), indicating that  $\text{CaCO}_3$  was partially decomposed into  $\text{CaO}$  at 700 °C. The diffraction peak of  $\text{CaC}_2\text{O}_4$  carbonized at 800 °C coincides with those of  $\text{CaO}$  (JCPDS 48-1467), indicating  $\text{CaCO}_3$  was completely decomposed into  $\text{CaO}$  at 800 °C.

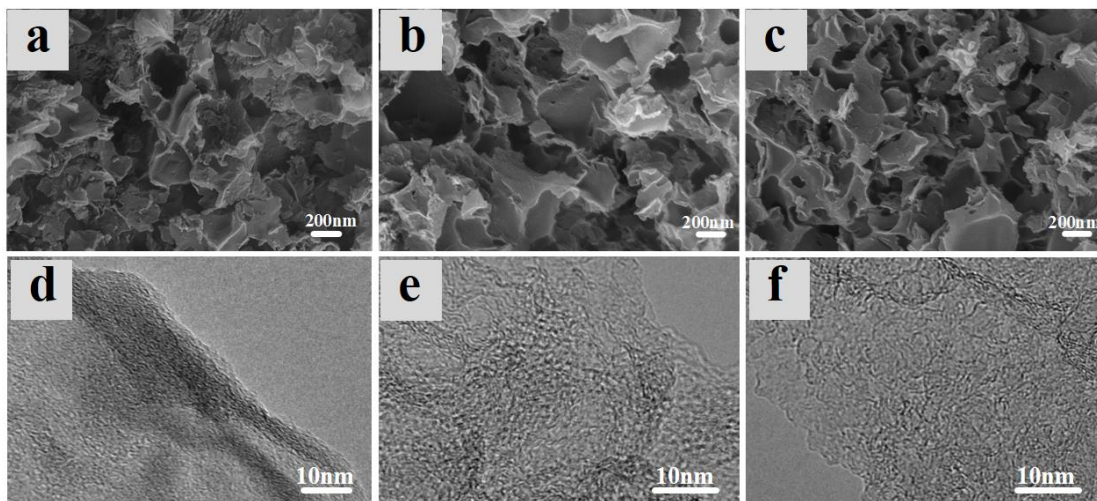

**Fig. S3.** SEM images of (a) PLPCC-600, (b) PLPCC-700, (c) PLPCC-800. HRTEM images of (d) PLPCC-600, (e) PLPCC-700, (f) PLPCC-800.

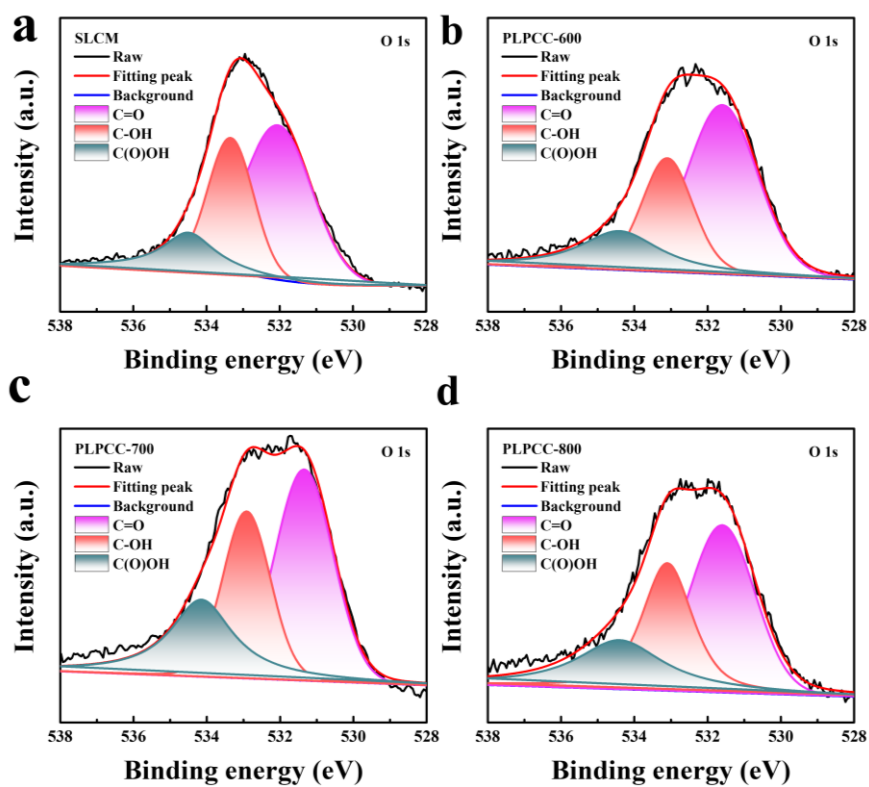

**Fig. S4.** Deconvolution of high-resolution O 1s spectra of PLPCCs and SLCM.

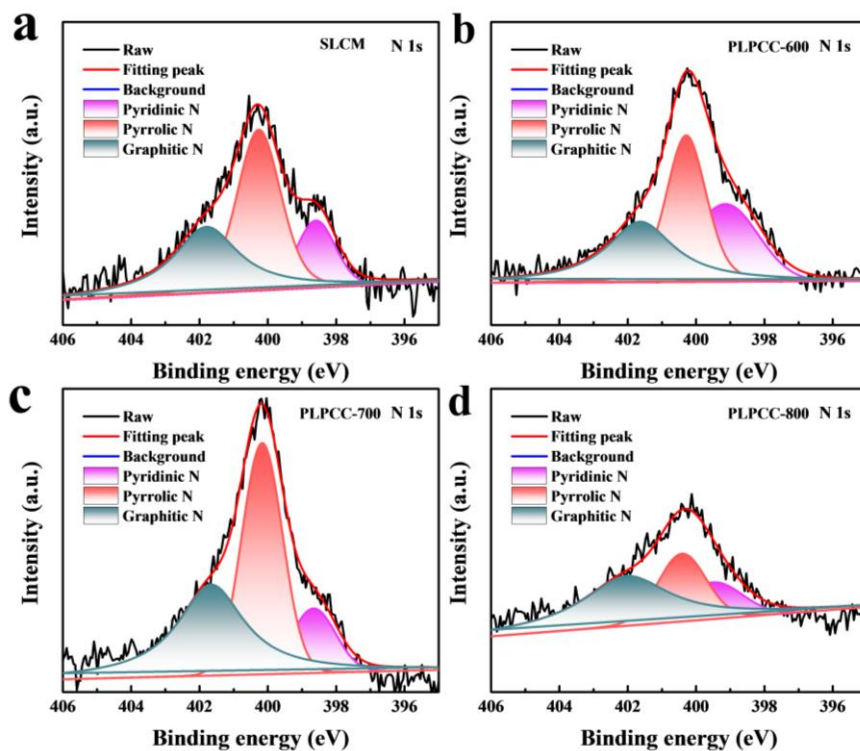

**Fig. S5.** Deconvolution of high-resolution N 1s spectra of PLPCCs and SLCM.

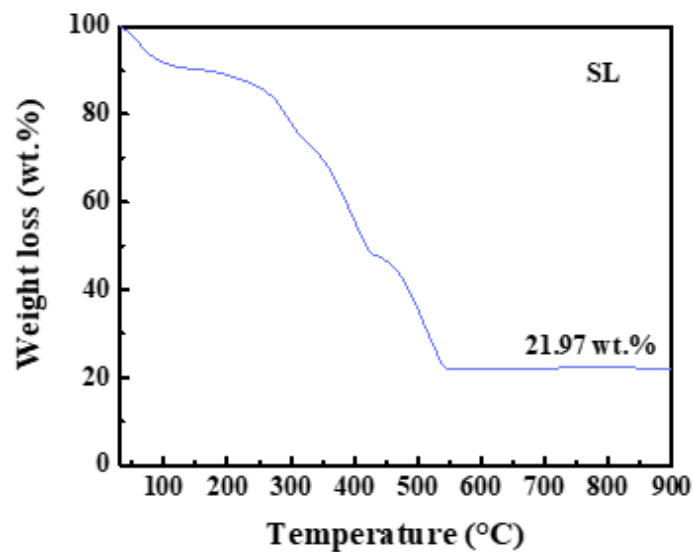

**Fig. S6.** TG curves of SL under air atmosphere. After air heat treatment at 900 °C, the ash residue of SL is 21.97 wt.%.

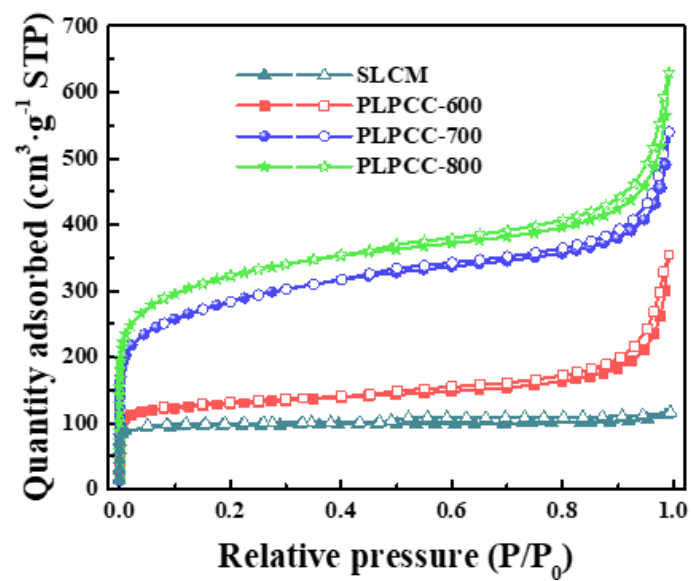

Fig. S7. Nitrogen adsorption and desorption isotherms.

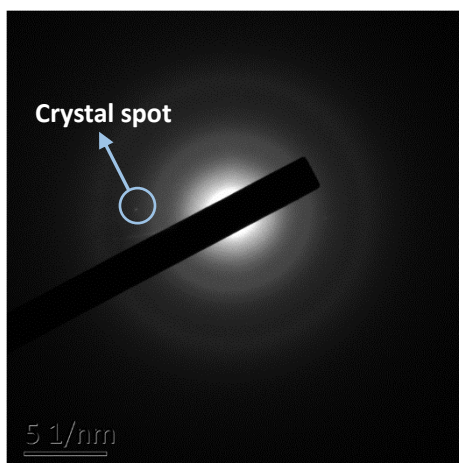

Fig. S8. SEAD pattern of PLPCC-700.

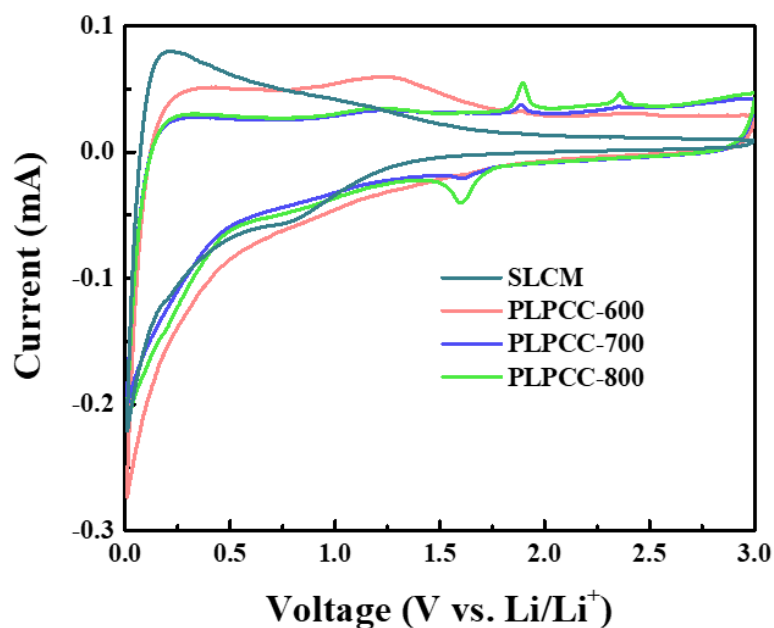

Fig. S9. The first CV curves of electrodes.

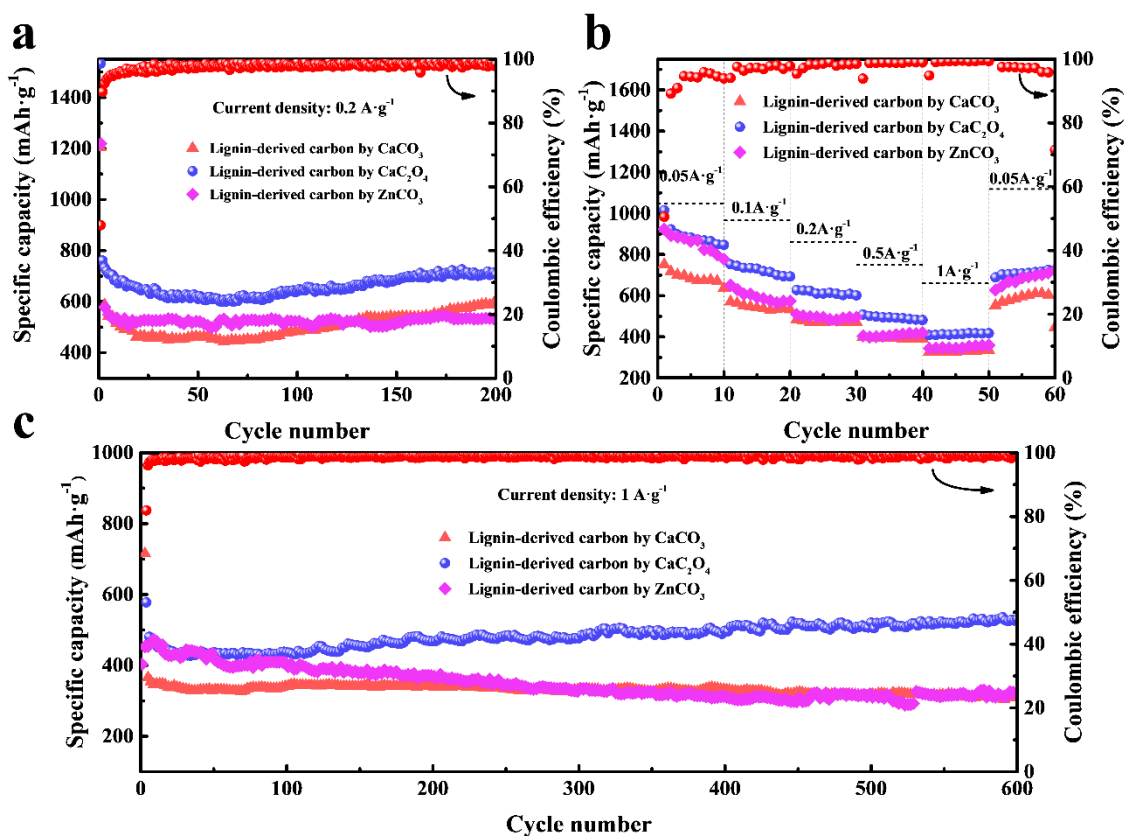

Fig. S10. Comparison of lithium storage capabilities of the lignin-derived carbons prepared by  $\text{CaCO}_3$ ,  $\text{CaC}_2\text{O}_4$  and  $\text{ZnCO}_3$ . (a) GCD curves at  $0.2 \text{ A}\cdot\text{g}^{-1}$ . (b) Rate performance at  $0.05\text{-}1 \text{ A}\cdot\text{g}^{-1}$ . (c) Long-cycling performance at  $1 \text{ A}\cdot\text{g}^{-1}$ .

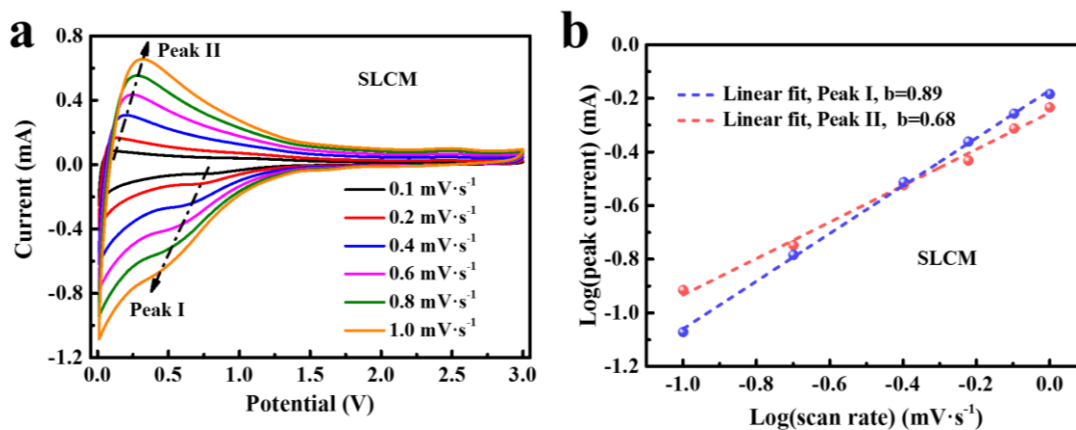

**Fig. S11.** (a) CV curves of SLCM at different scan rates. (b) Determination of  $b$  values.

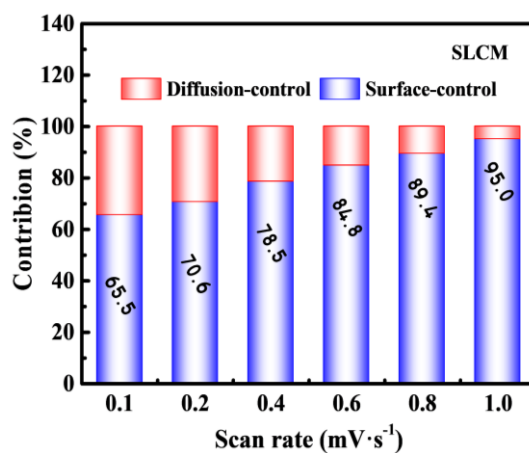

**Fig. S12.** (a) Capacitance-controlled and diffusion-controlled contribution of SLCM.

## Supplementary Tables

**Table S1** Surface O and N configurations of SLCM and PLPCCs.

| Samples   | Percentage of O-containing groups |      |      | Percentage of N-containing groups |      |      |
|-----------|-----------------------------------|------|------|-----------------------------------|------|------|
|           | C=O                               | C-OH | COOH | N-6                               | N-5  | N-Q  |
| SLCM      | 28.2                              | 47.2 | 24.6 | 15.9                              | 46.2 | 37.9 |
| PLPCC-600 | 53.3                              | 27.3 | 19.4 | 24.5                              | 37.0 | 38.5 |
| PLPCC-700 | 52.3                              | 25.0 | 22.7 | 13.2                              | 43.9 | 42.8 |
| PLPCC-800 | 43.2                              | 31.5 | 25.3 | 17.7                              | 27.6 | 54.7 |

**Table S2** Textural properties of SLCM and the PLPCC samples at 600-800°C.

| Samples   | $S_{\text{BET}}$          | $V_{\text{total}}$         | $V_{\text{mic}}$           | $V_{\text{meso}}$          | $V_{\text{mic}}/V_{\text{total}}$ | $V_{\text{meso}}/V_{\text{total}}$ | $D_{\text{avg}}$ (nm) |
|-----------|---------------------------|----------------------------|----------------------------|----------------------------|-----------------------------------|------------------------------------|-----------------------|
|           | ( $\text{m}^2/\text{g}$ ) | ( $\text{cm}^3/\text{g}$ ) | ( $\text{cm}^3/\text{g}$ ) | ( $\text{cm}^3/\text{g}$ ) | (%)                               | (%)                                |                       |
| SLCM      | 385.5                     | 0.15                       | 0.12                       | 0.02                       | 80.0                              | 13.3                               | 1.87                  |
| PLPCC-600 | 491.3                     | 0.49                       | 0.17                       | 0.23                       | 34.7                              | 46.9                               | 3.01                  |
| PLPCC-700 | 1028.7                    | 0.75                       | 0.35                       | 0.32                       | 46.7                              | 42.7                               | 2.58                  |
| PLPCC-800 | 1175.6                    | 0.87                       | 0.41                       | 0.36                       | 47.1                              | 41.4                               | 2.57                  |

$S_{\text{BET}}$ : Specific surface area was determined using the Brunauer-Emmett-Teller (BET) equation.

$V_{\text{total}}$ : Total pore volume was determined by NLDFT model.

$V_{\text{mic}}$ : Micropore volume was determined by NLDFT model.

$V_{\text{meso}}$ : Mesopore volume was determined by NLDFT model.

**Table S3** Specific capacities of PLPCCs tested under the current density of 0.2 and 1  $\text{A}\cdot\text{g}^{-1}$ .

| Electrodes | Specific capacity ( $\text{mAh}\cdot\text{g}^{-1}$ ) |       |                                |       |
|------------|------------------------------------------------------|-------|--------------------------------|-------|
|            | 0.2 $\text{A}\cdot\text{g}^{-1}$                     |       | 1 $\text{A}\cdot\text{g}^{-1}$ |       |
|            | 25th                                                 | 200th | 100th                          | 600th |
| SLCM       | 235.1                                                | 256.1 | 165.0                          | 209.7 |
| PLPCC-600  | 455.5                                                | 543.2 | 322.9                          | 386.5 |
| PLPCC-700  | 642.5                                                | 706.3 | 436.9                          | 530.4 |
| PLPCC-800  | 445.8                                                | 618.5 | 289.3                          | 448.7 |

**Table S4** Comparison of lithium storage performance of PLPCC-700 with different carbonaceous materials in the reported literatures.

| Materials                         | Specific surface area ( $\text{m}^2\cdot\text{g}^{-1}$ ) | ICE <sup>a</sup> (%) | Cycling data <sup>b</sup> | Rate capacity <sup>c</sup> | Ref.      |
|-----------------------------------|----------------------------------------------------------|----------------------|---------------------------|----------------------------|-----------|
| PLPCC-700                         | 1029                                                     | 49.2                 | 706/200/200               | 530/1000                   | This work |
| Hierarchical porous carbon (HPC)  | 420                                                      | 40.4                 | 390/50/37                 | 266/1860                   | [1]       |
| Hierarchical porous carbon (LHPC) | 907                                                      | 41.6                 | 470/275/200               | 268/1000                   | [2]       |



|                                                          |     |      |             |          |     |
|----------------------------------------------------------|-----|------|-------------|----------|-----|
| Hierarchical porous carbon (HLPC-ZnCO <sub>3</sub> -600) | 531 | 54.9 | 550/200/200 | 315/1000 | [3] |
| Hierarchical porous carbon (KHPC-600)                    | 735 | 47.3 | 650/60/100  | 346/5000 | [4] |
| Macroporous carbon (MPC-3)                               | 631 | 54.3 | 501/120/200 | 306/1000 | [5] |
| Nanoporous hard carbon microspheres (NHCS-6)             | 753 | 45.0 | 230/30/100  | 157/1490 | [6] |
| Carbon nanofibers/nanosheets hybrid (CNFS)               | 847 | -    | 592/200/100 | 508/1000 | [7] |
| Graphene aerogels (GA)                                   | 530 | -    | 439/30/100  | 250/1000 | [8] |
| N-doped carbon nitride (CNNC)                            | -   | -    | 430/60/50   | 323/2500 | [9] |

<sup>a</sup> Initial coulombic efficiency

<sup>b</sup> Capacity (mAh·g<sup>-1</sup>)/cycle numbers/current density (mA·g<sup>-1</sup>)

<sup>c</sup> Capacity (mAh·g<sup>-1</sup>)/current density (mA·g<sup>-1</sup>).

## References

- [1] J. Yang, X. Y. Zhou, Y. L. Zou and J. J. Tang, *Electrochim Acta*, 2011, **56**, 8576-8581.
- [2] W. L. Zhang, J. Yin, Z. Q. Lin, H. B. Lin, H. Y. Lu, Y. Wang and W. M. Huang, *Electrochim Acta*, 2015, **176**, 1136-1142.
- [3] Y. B. Xi, S. Huang, D. J. Yang, X. Q. Qiu, H. J. Su, C. H. Yi and Q. Li, *Green Chem*, 2020, **22**, 4321-4330.
- [4] D. P. Qiu, C. H. Kang, M. Li, J. Y. Wei, Z. W. Hou, F. Wang and R. Yang, *Carbon*, 2020, **162**, 595-603.
- [5] Y. X. Fu, X. Y. Pei, D. C. Mo and S. S. Lyu, *J Mater Sci-Mater El*, 2019, **30**, 5092-5097.
- [6] S. M. Jafari, M. Khosravi and M. Mollazadeh, *Electrochim Acta*, 2016, **203**, 9-20.
- [7] S. B. Wang, C. L. Xiao, Y. L. Xing, H. Z. Xu and S. C. Zhang, *J Mater Chem A*, 2015, **3**, 6742-6746.
- [8] Y. X. Xu, Z. Y. Lin, X. Zhong, B. Papandrea, Y. Huang and X. F. Duan, *Angew Chem Int Edit*, 2015, **54**, 5345-5350.
- [9] W. L. Zhang, J. Yin, C. L. Chen and X. Q. Qiu, *Chem Eng Sci*, 2021, **241**, 116709.
